# Supplementary material
Source: publisher figshare collection journal article supplement (https://tandf.figshare.com/ndownloader/files/22566350)
Supplement: Supplementary file 1 [file 22566350]

**Supporting Information for**

**Diamino malenonitrile-linked naphthalimide in selective sensing of F-, CN-, Hg2+ and Cu2+ under different experimental conditions**

**Chiranjit Pati, Asoke P. Chattopadhyay and Kumaresh Ghosh***

*Department of Chemistry, University of Kalyani, Kalyani-741235, India.*

*Email:* [*ghosh_k2003@yahoo.co.in*](mailto:ghosh_k2003@yahoo.co.in)

**Fig. S1.** Change in absorbance of **1** (c = 2.5 x 10-5 M) upon addition of 6 equiv. amounts of (a) CN-, (b) AcO-, (c) DHP, (d) Cl-, (e) Br-, (f) I-, (g) HSO4- (c = 1x 10-3 M) as tetrbutylammonium salts in CH3CN containing 1% DMSO.


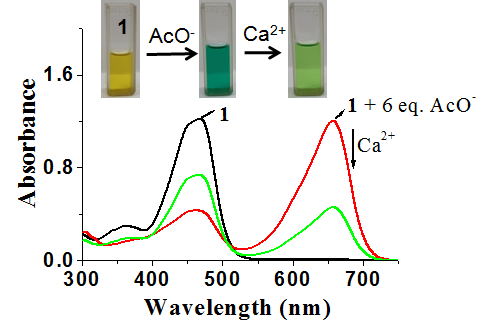


**Fig. S2.** Change in absorbance of **1** (c = 2.5 x 10-5 M) upon addition of 6 equiv. amounts of AcO- (*c* = 1 x 10-3 M) followed by addition of 4 equiv. amounts of Ca2+ ion at a time in CH3CN containing 1% DMSO.

**Fig. S3.** Change in absorbance of **1** (c = 2.5 x 10-5 M) upon addition of 6 equiv. amounts of (a) F-, (b) CN-, (c) AcO-, (d) DHP (c = 1x 10-3 M) as tetrbutylammonium salts followed by gradual addition of H2O in CH3CN containing 1% DMSO.


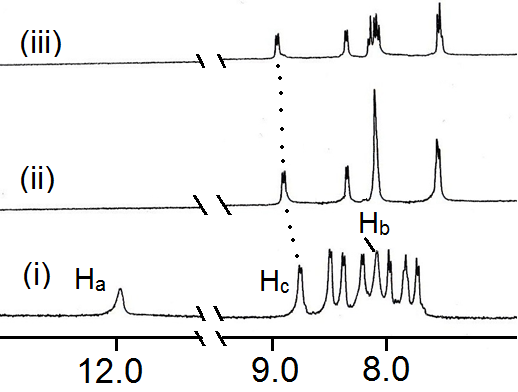


**Fig. S4.** Partial 1H NMR spectra (*d6*-DMSO, 400 MHz) of (i) **1**, (ii) **1** with 1 equiv. amount of AcO- ion and (iii) **1** with 2 equiv. amounts of AcO- ions.

**Fig. S5.** (a) Absorption spectrum (red), fluorescence emission spectrum (blue; λexc = 370 nm) and fluorescence excitation spectrum (black; λem = 517 nm) of **1** in CH3CN containing 1% DMSO; (b) Fluorescence excitation spectra of **1** (at λem = 517 nm and 410 nm) in CH3CN containing 1% DMSO. All the spectra are normalized at the absorption peak maxima.


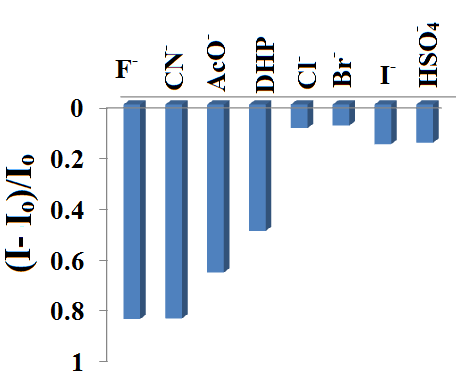


**Fig. S6.** Change in fluorescence ratio [(I-Io)/Io] (λex = 370 nm) of **1** (c = 2.5 x 10-5 M) upon addition of 6 equiv. amounts of different anions (c = 1x 10-3 M) as tetrbutylammonium salts in CH3CN containing 1% DMSO.

**Fig. S7.** Change in emission (λex = 370 nm) of **1** (c = 2.5 x 10-5 M) upon addition of 6 equiv. amounts of (a) F-, (b) CN-, (c) AcO-, (d) DHP, (e) Cl-, (f) Br-, (g) I- and (h) HSO4- (c = 1 x 10-3 M) as tetrbutylammonium salts in CH3CN containing 1% DMSO.

**Fig. S8.** Benesi–Hilderband plots from fluorescence data at 517 nm for(a) F-, (b) CN-, (c) AcO- and (d) DHP.

**Fig. S9.** Detection limit of **1**(c = 2.5 x 10-5 M) with F- at 658 nm from UV-vis titration in CH3CN containing 1% DMSO.

**Fig. S10.** Change in absorbance of **1** (c = 2.5 x 10-5 M) upon addition of 16 equiv. amounts of (a) F-, (b) AcO-, (c) DHP, (d) Cl-, (e) Br-, (f) I- and (g) HSO4- (c = 1x 10-3 M) as tetrbutylammonium salts in CH3CN-H2O (9:1, v/v) containing 1% DMSO.


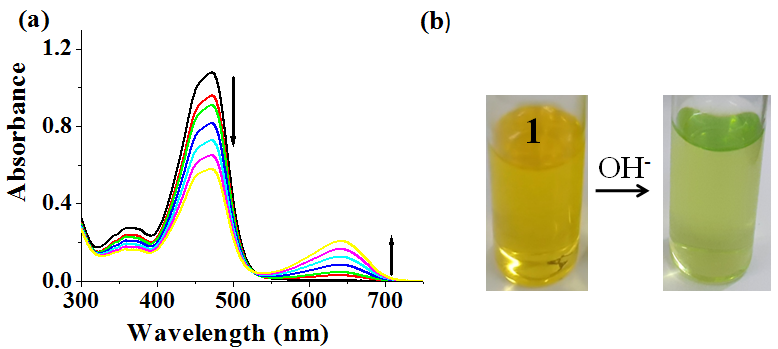


**Fig. S11.** Change in (a) absorbance and (b) color change of **1** (c = 2.5 x 10-5 M) upon addition of 16 equiv. amounts of OH- ions (c = 1 x 10-3 M) as tetrbutylammonium salts in CH3CN-H2O (9:1, v/v) containing 1% DMSO.


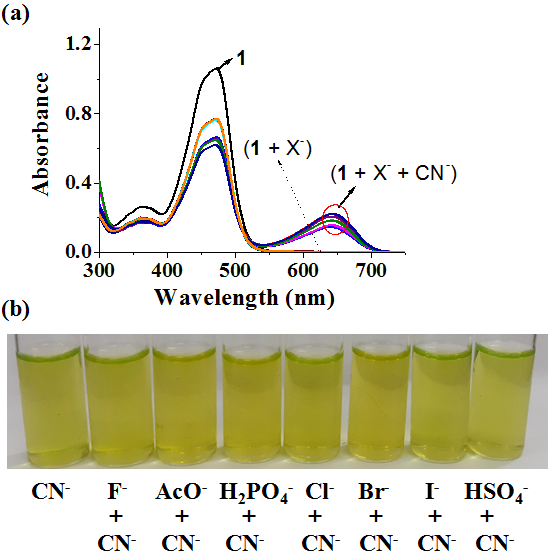


**Fig. S12.** Competitive selectivity of **1** (c = 2.5 x 10-5 M) towards CN- in the presence of 16 equivalent amounts of other anions (X- where X- = F-, AcO-, H2PO4-, Cl-, Br-, I- and HSO4-).

**Fig. S13.** Change in emission (λex = 370 nm) of **1** (c = 2.5 x 10-5 M) upon addition of 20 equiv. amounts of (a) F-, (b) AcO-, (c) DHP, (d) Cl-, (e) Br-, (f) I-, (g) HSO4- and (h) OH- (c = 1 x 10-3 M) as tetrbutylammonium salts in CH3CN-H2O (9:1, v/v) containing 1% DMSO.

**Fig. S14.** (a)Benesi–Hilderband plot of **1** (*c* = 2.5 x 10-5 M) with CN- (*c* = 1 x 10-3 M) at 525 nm and (b) detection limit of **1** (*c* = 2.5 x 10-5 M) with CN- (*c* = 1 x 10-3 M) calculated from fluorescence titration data at 525 nm in CH3CN-H2O (9:1, v/v) containing 1% DMSO.

**Fig. S15.** Change in absorbance of **1** (c = 2.5 x 10-5 M) upon addition of 4 equiv. amount of aqueous solution of (a) Zn(NO3)2, (b) Co(NO3)2, (c) Ni(NO3)2, (d) AgNO3, (e) Pb(NO3)2, (f) Cd(ClO4)2, (g) Fe(ClO4)2, (h) Fe(NO3)3, (i) Al(ClO4)3, (j) HgCl2, (k) Hg(AcO)2, (l) Hg(NO3)2 and (m) Cu(NO3)2 (c = 1x 10-3 M) in CH3CN-H2O (2:1, v/v) containing 1% DMSO.


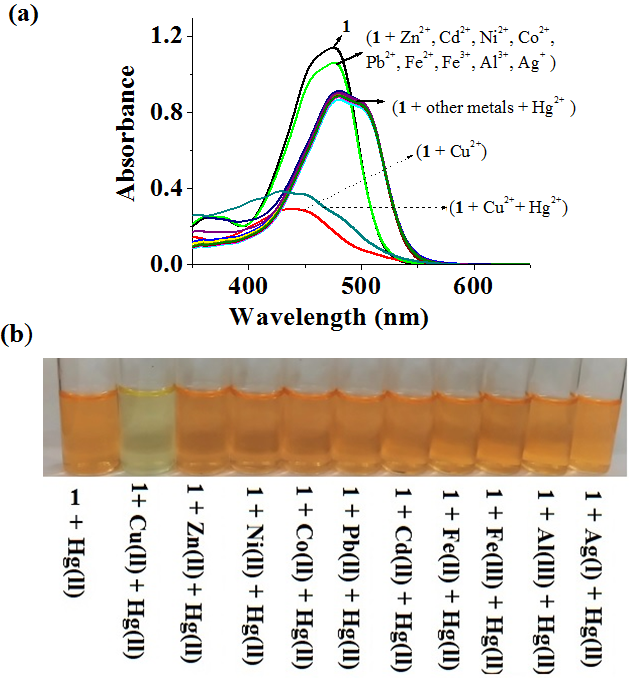


**Fig. S16.** (a) Change in absorbance of **1** (c = 2.5 x 10-5 M) towards Hg2+ ions in presence of 4 equiv. amounts of other metal ions (c = 1 x 10-3 M) in CH3CN-H2O (2:1, v/v) containing 1% DMSO; (b) Color change of **1** with Hg2+ ions in presence of other metal ions.


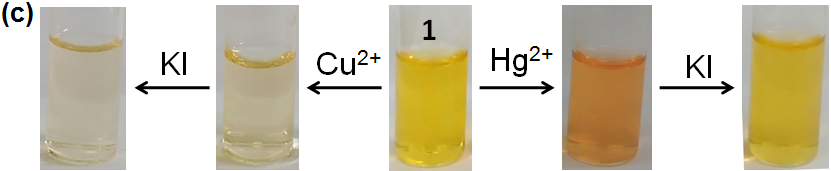


**Fig. S17.** Change in absorbance of **1** (c = 2.5 x 10-5 M) upon addition of 4 equiv. amounts of (a) Hg2+ and (b) Cu2+ (c = 1 x 10-3 M) followed by addition of KI (c = 1 x 10-3 M) in CH3CN-H2O (2:1, v/v) containing 1% DMSO; (c) Color change of **1** upon addition of 4 equiv. amounts of Hg2+ and Cu2+ (c = 1 x 10-3 M) ions followed by addition of KI (c = 1 x 10-3 M) in CH3CN-H2O (2:1, v/v) containing 1% DMSO.


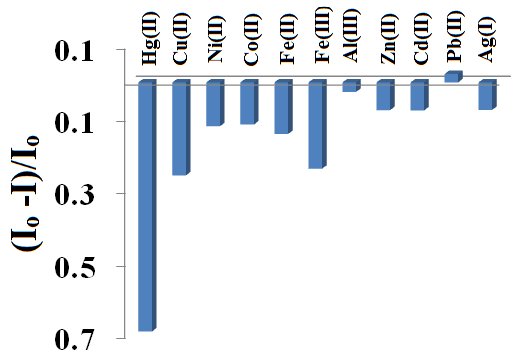


**Fig. S18.** Change in fluorescence ratio (I-Io/Io) of **1** (c = 2.5 x 10-5 M) at 526 nm in presence of 3 equiv. amounts of different metal ions (c = 1 x 10-3 M) in CH3CN: H2O (2:1, v/v) containing 1% DMSO.

**Fig. S19.** Change in emission (λex = 370 nm) of **1** (c = 2.5 x 10-5 M) upon addition of 3 equiv. amounts of aqueous solution of (a) Zn(NO3)2, (b) Co(NO3)2 , (c) Ni(NO3)2, (d) AgNO3, (e) Pb(NO3)2, (f) Cd(ClO4)2, (g) Fe(ClO4)2, (h) Fe(NO3)3, (i) Al(ClO4)3, (j) HgCl2, (k) Hg(ClO4)2, (l) Hg(AcO)2, (m) Hg(NO3)2, (n) Cu(NO3)2 (c = 1 x 10-3 M) in CH3CN-H2O (2:1, v/v) containing 1% DMSO.


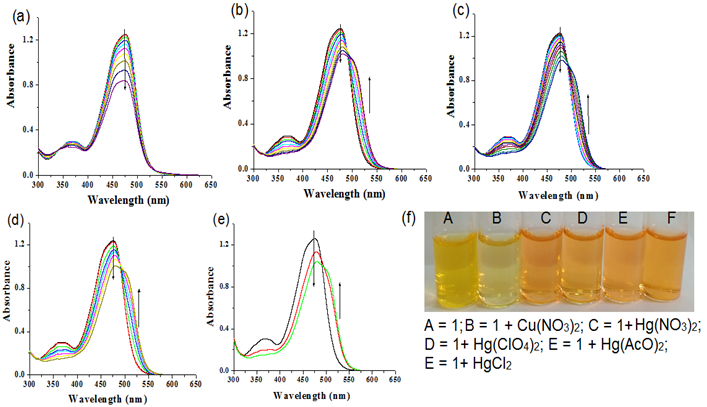


**Fig. S20.** Change in absorbance of **1** (c = 2.5 x 10-5 M) upon addition of 5 equiv. amount of aqueous solution of (a) Cu(NO3), (b) Hg(NO3)2, (c) Hg(ClO4)2, (d) Hg(OAc)2, and (e) HgCl2 (c = 1 x 10-3 M) in CH3CN-HEPES buffer, (2:1, v/v, 10 mM, pH 6.80) containing 1% DMSO; (f) Color change of **1** (c = 2.5 x 10-5 M) upon addition of 5 equiv. amounts of different metal ions (c = 1 x 103 M) in CH3CN-HEPES buffer, (2:1, v/v, 10 mM, pH 6.80) containing 1% DMSO.

**Fig. S21.** Change in emission (λex = 370 nm) of **1** (c = 2.5 x 10-5 M) upon addition of 5 equiv. amounts of aqueous solution of (a) Cu(NO3), (b) Hg(NO3)2, (c) Hg(ClO4)2, (d) Hg(OAc)2, and (e) HgCl2 (*c* = 1 x 10-3 M) in CH3CN-HEPES buffer, (2:1, v/v, 10mM, pH 6.80) containing 1% DMSO.

**Fig. S22.** UV-vis Job plots for **1** with (a) Hg2+ at 470 nm and (b) Cu2+ at 470 nm where [H] = [G] = 2.5 x 10-5 M.

**Fig. S23.** Benesi–Hilderband plots for **1** (*c* = 2.5 x 10-5 M) with (a) Hg2+ and (b) Cu2+ (*c* = 1.0 x 10-3 M) at 526 nm in CH3CN-HEPES buffer (2:1, v/v, 10mM, pH 6.80) containing 1% DMSO.

**Fig. S24.** Detection limits of **1** (*c* = 2.5 x 10-5 M) (a) for Hg2+ (*c* = 1.0 x 10-3 M) and (b) Cu2+ (*c* = 1.0 x 10-3 M) in CH3CN-HEPES buffer, (2:1, v/v, 10mM, pH 6.81) containing 1% DMSO.


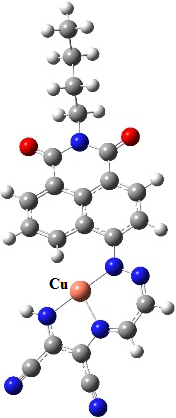


Optimization was done using DFT formalism, with Pople’s 6-311G(d,p) basis set and B3LYP functional. C, H, N, O were described by Pople’s 6-311G(d,p) basis set and for Cu it was TZV basis set. Onsager’s SCRF approximation with PCM model was used to describe the solvent.

**Fig. S25**. DFT optimized geometry of the complex **1.**Cu2+ in CH3CN.

**Table S1**. TDDFT results for **1.**Cu2+ complex in CH3CN.

| Sl No. | ΔE (eV) | λ (nm) | fosc | Main components |
| --- | --- | --- | --- | --- |
| 1 | 2.8765 | 431.02 | 0.1521 | H-1→L+1 (28.96), H→L+1 (28.48) |
| 2 | 2.9279 | 423.45 | 0.0143 | H-2→L (44.72), H-6→L (17.13), H-3→L (12.37) |
| 3 | 3.0173 | 410.90 | 0.0180 |  |
| 4 | 3.1277 | 396.41 | 0.0440 | H-3→L (16.93), H-2→L (11.50), H-1→L+2 (11.04) |
| 5 | 3.1873 | 389.00 | 0.0679 | H-4→L (45.74) |
| 6 | 3.2267 | 384.24 | 0.0650 | H-4→L (32.89), H-5→L (14.23), H-6→L (12.20) |


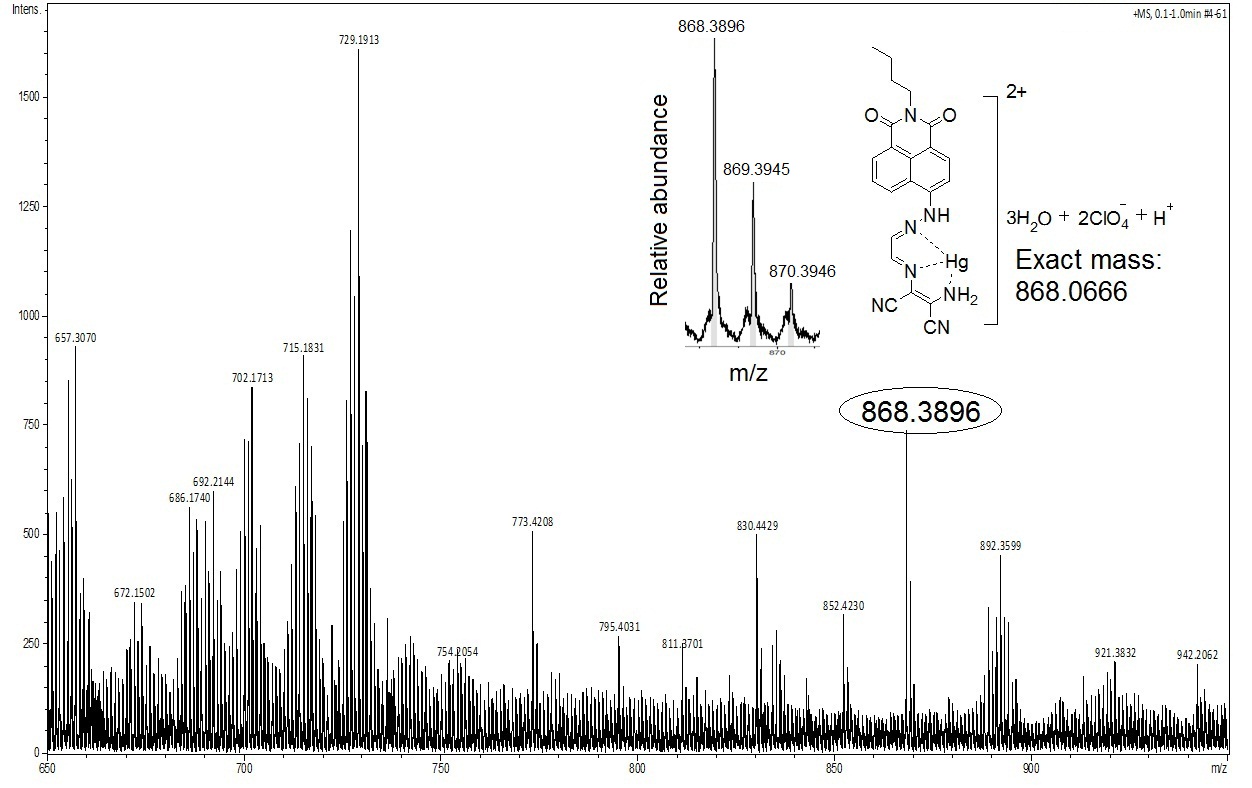


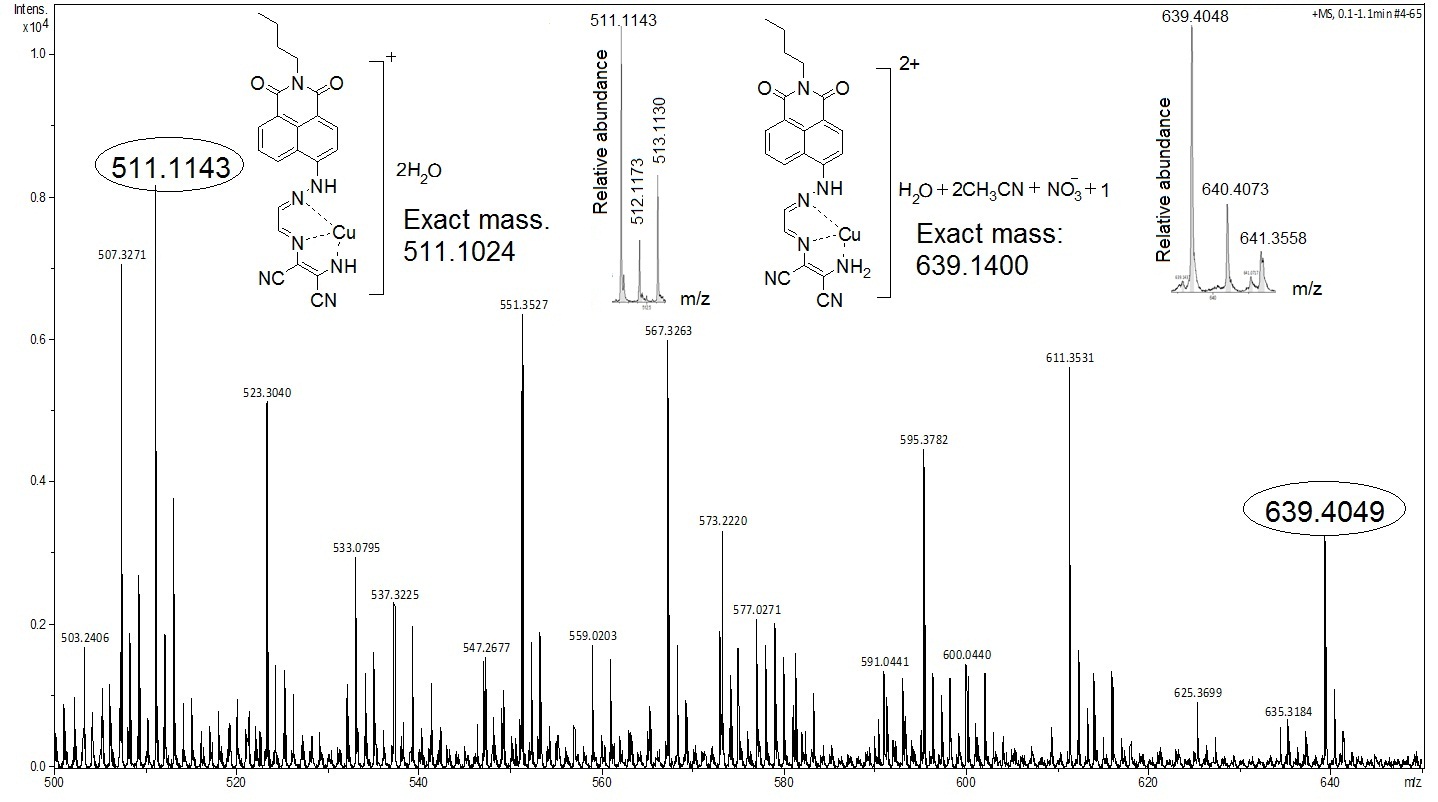


**Fig. S26**. Mass spectra of mercury (above) and copper complexes (below) of **1**.


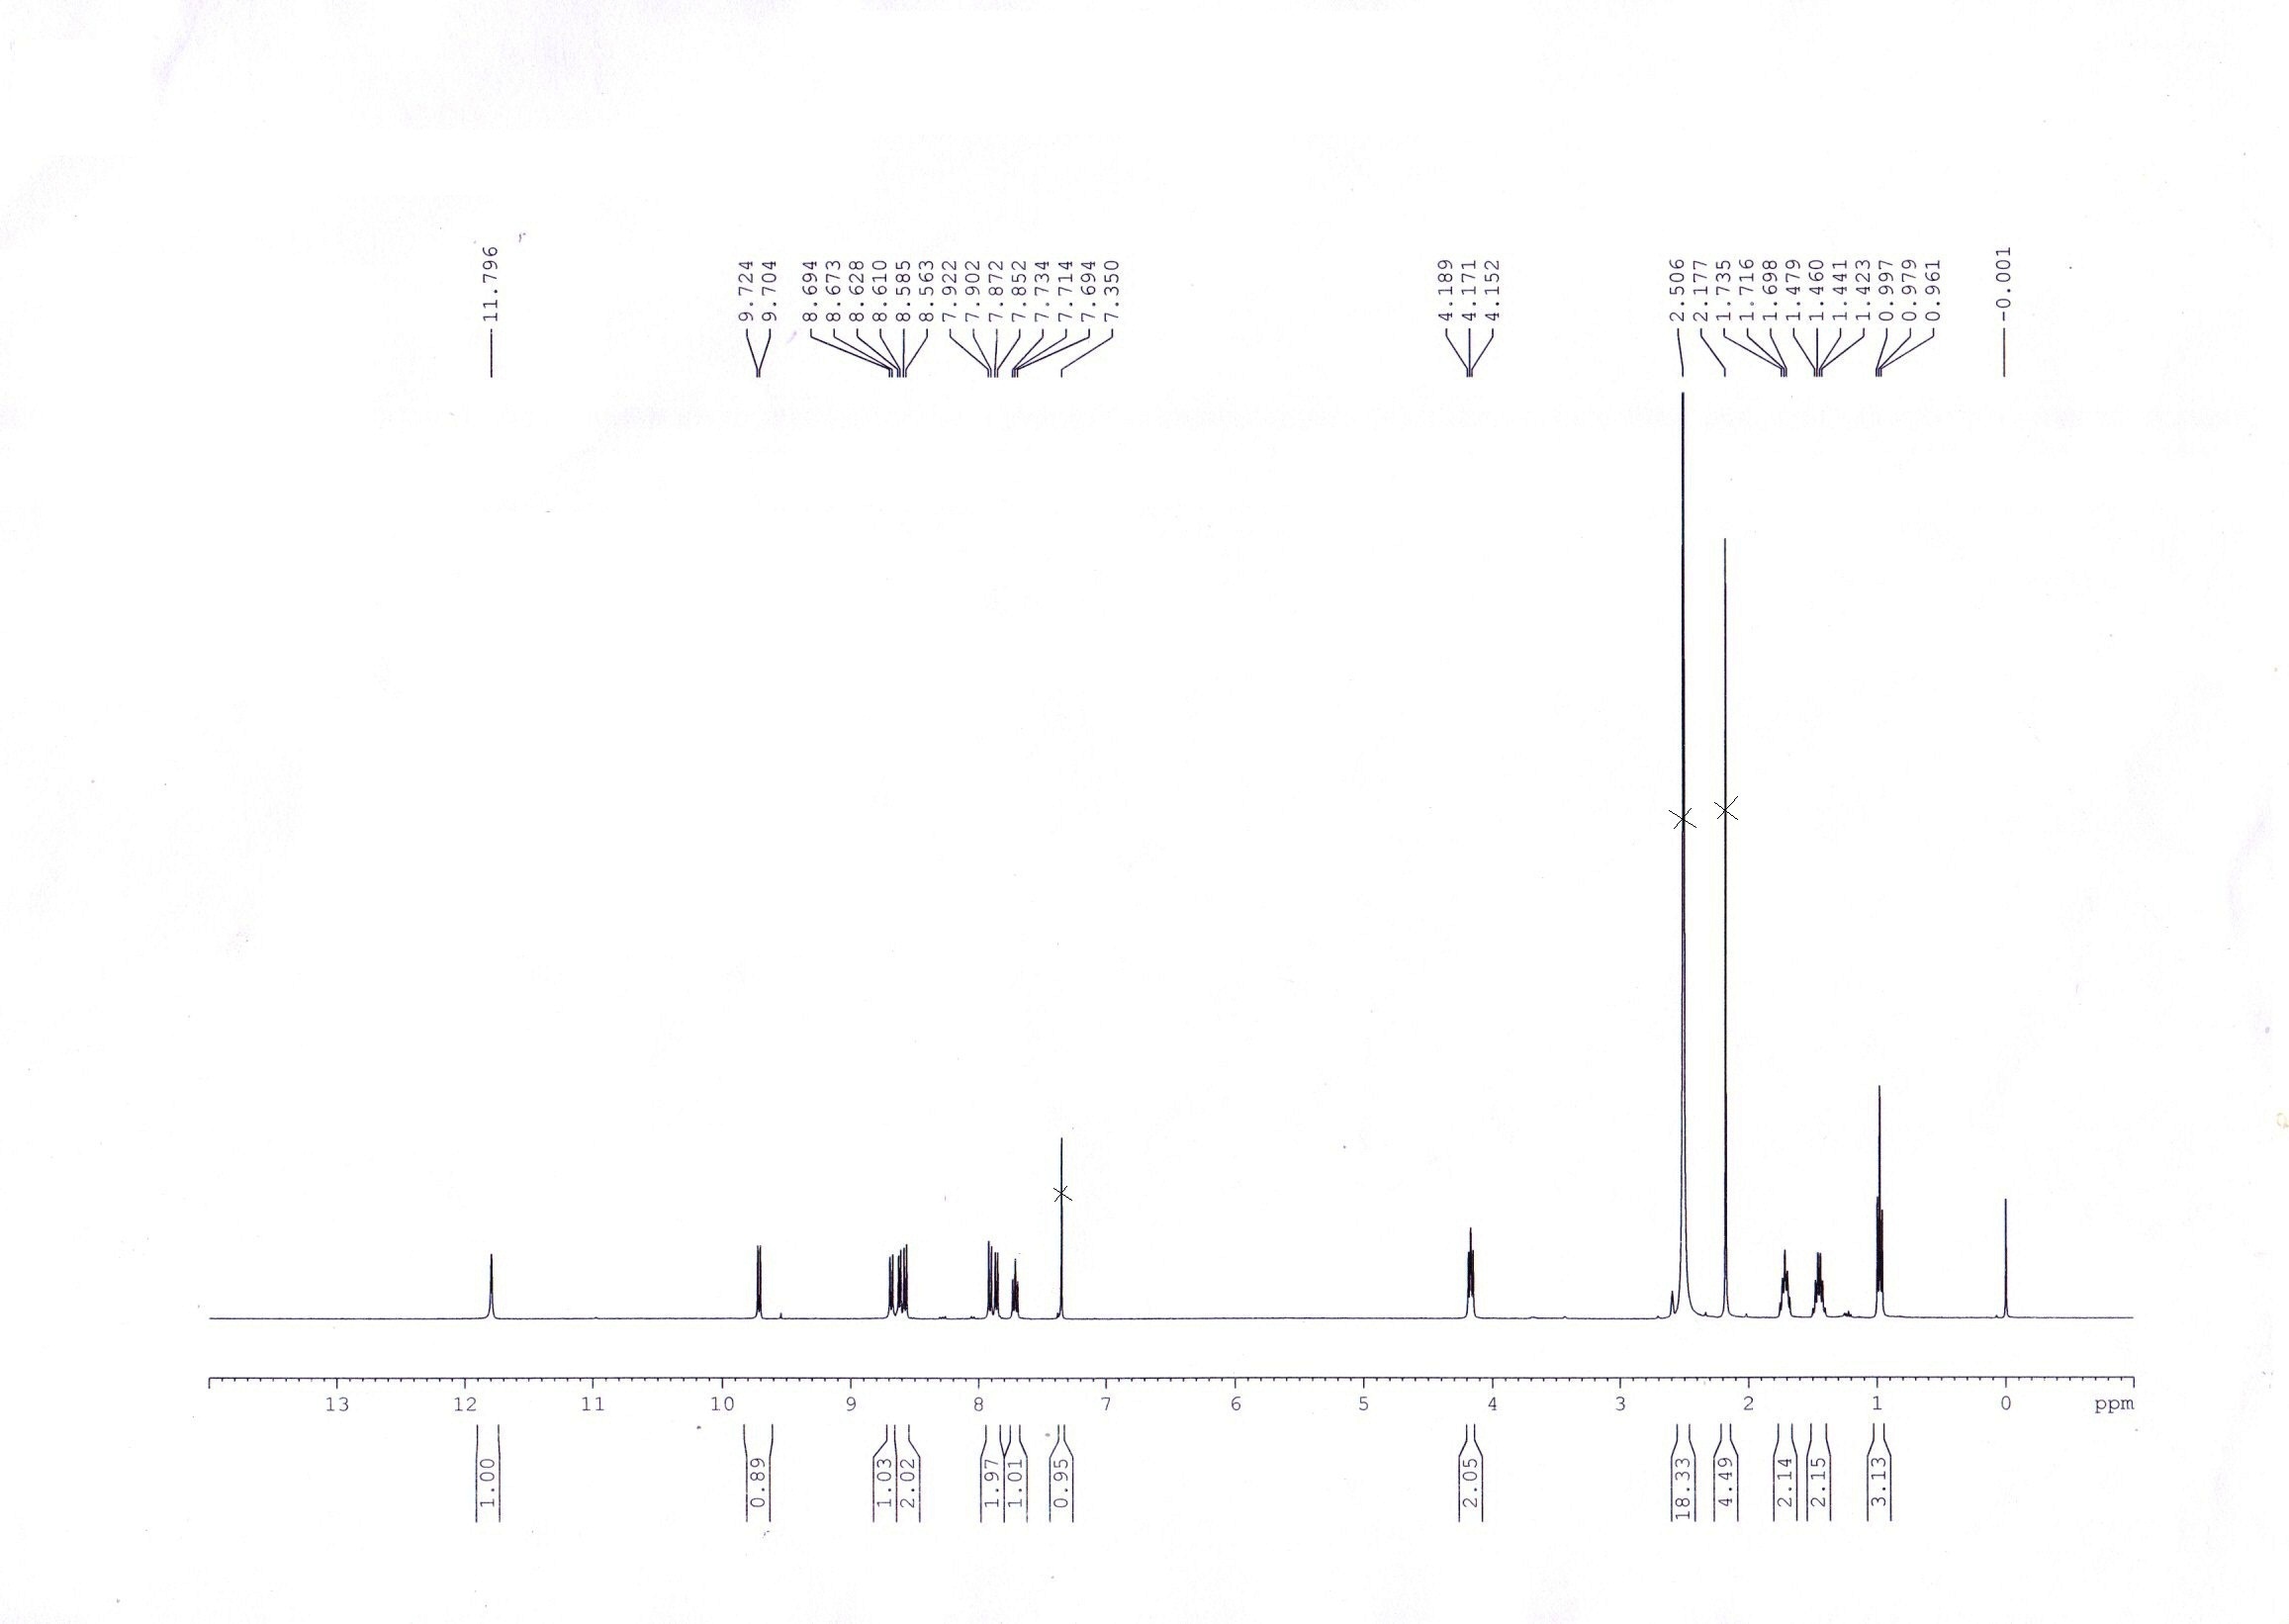


**Fig. S27**. 1H NMR spectra (400 MHz) of **3** in CDCl3 containing two drops of *d6*-DMSO.


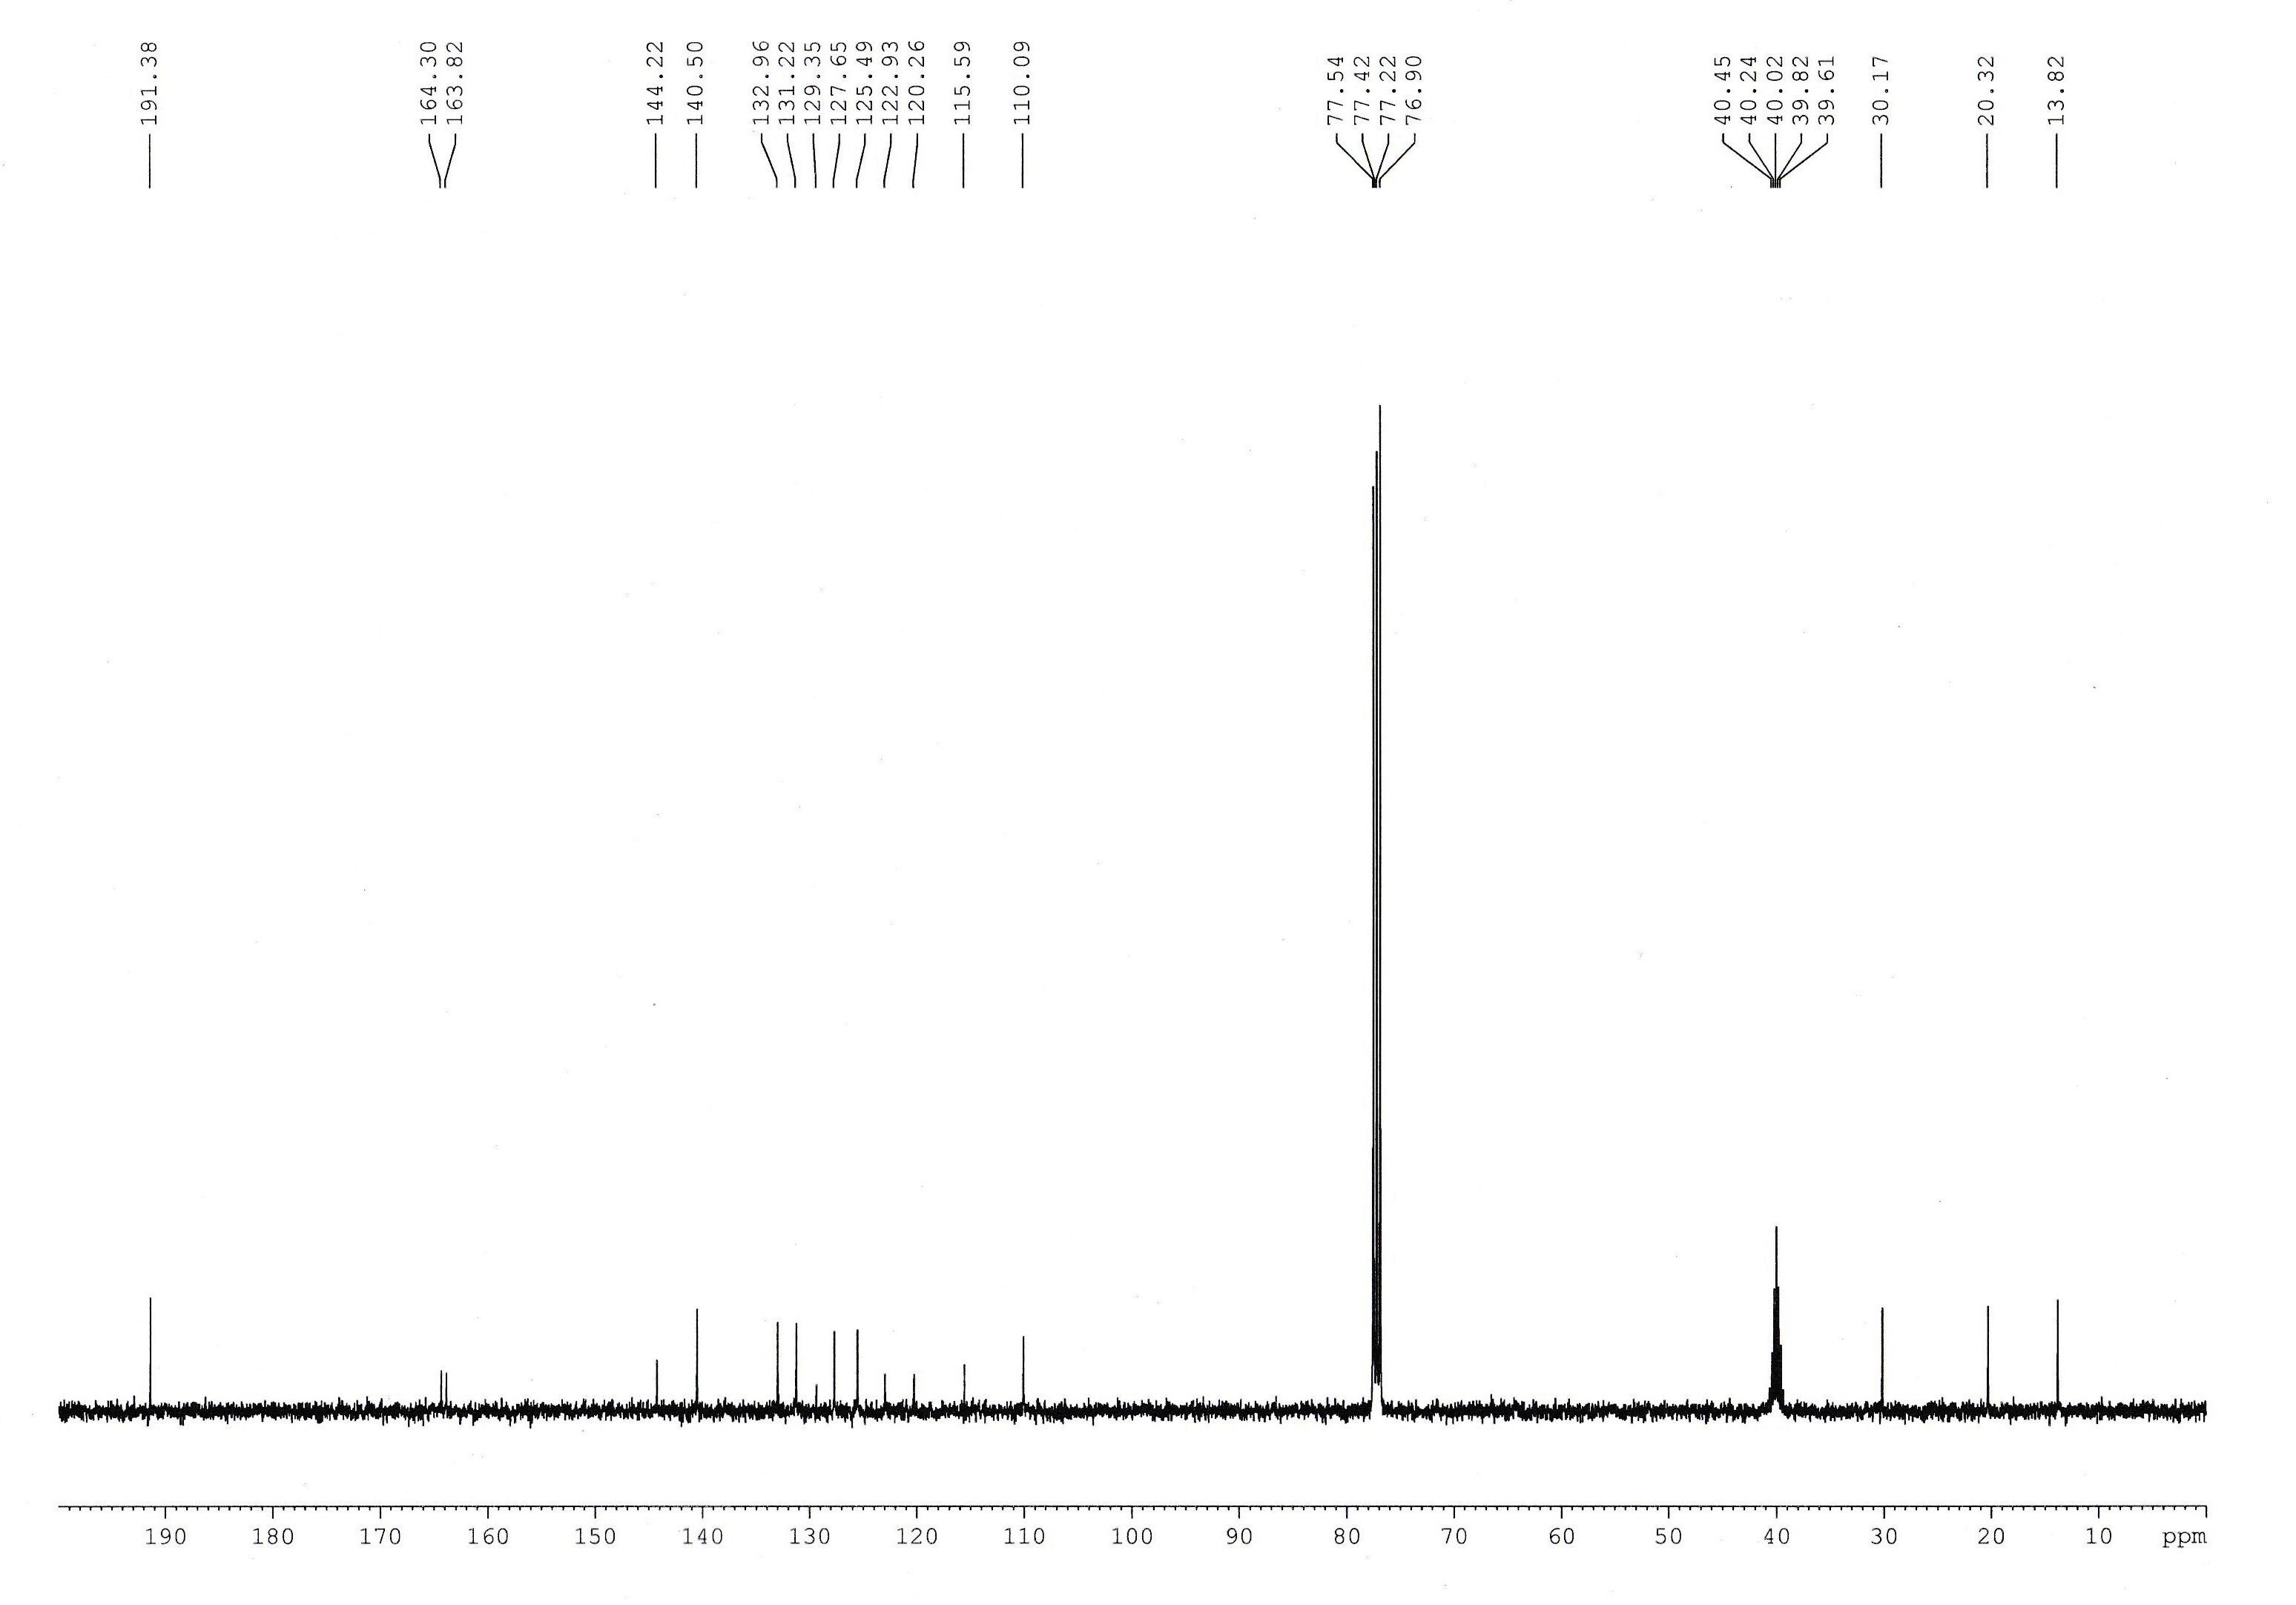


**Fig. S28**. 13C NMR spectra (100 MHz) of **3** in CDCl3 containing two drops of *d6*-DMSO.


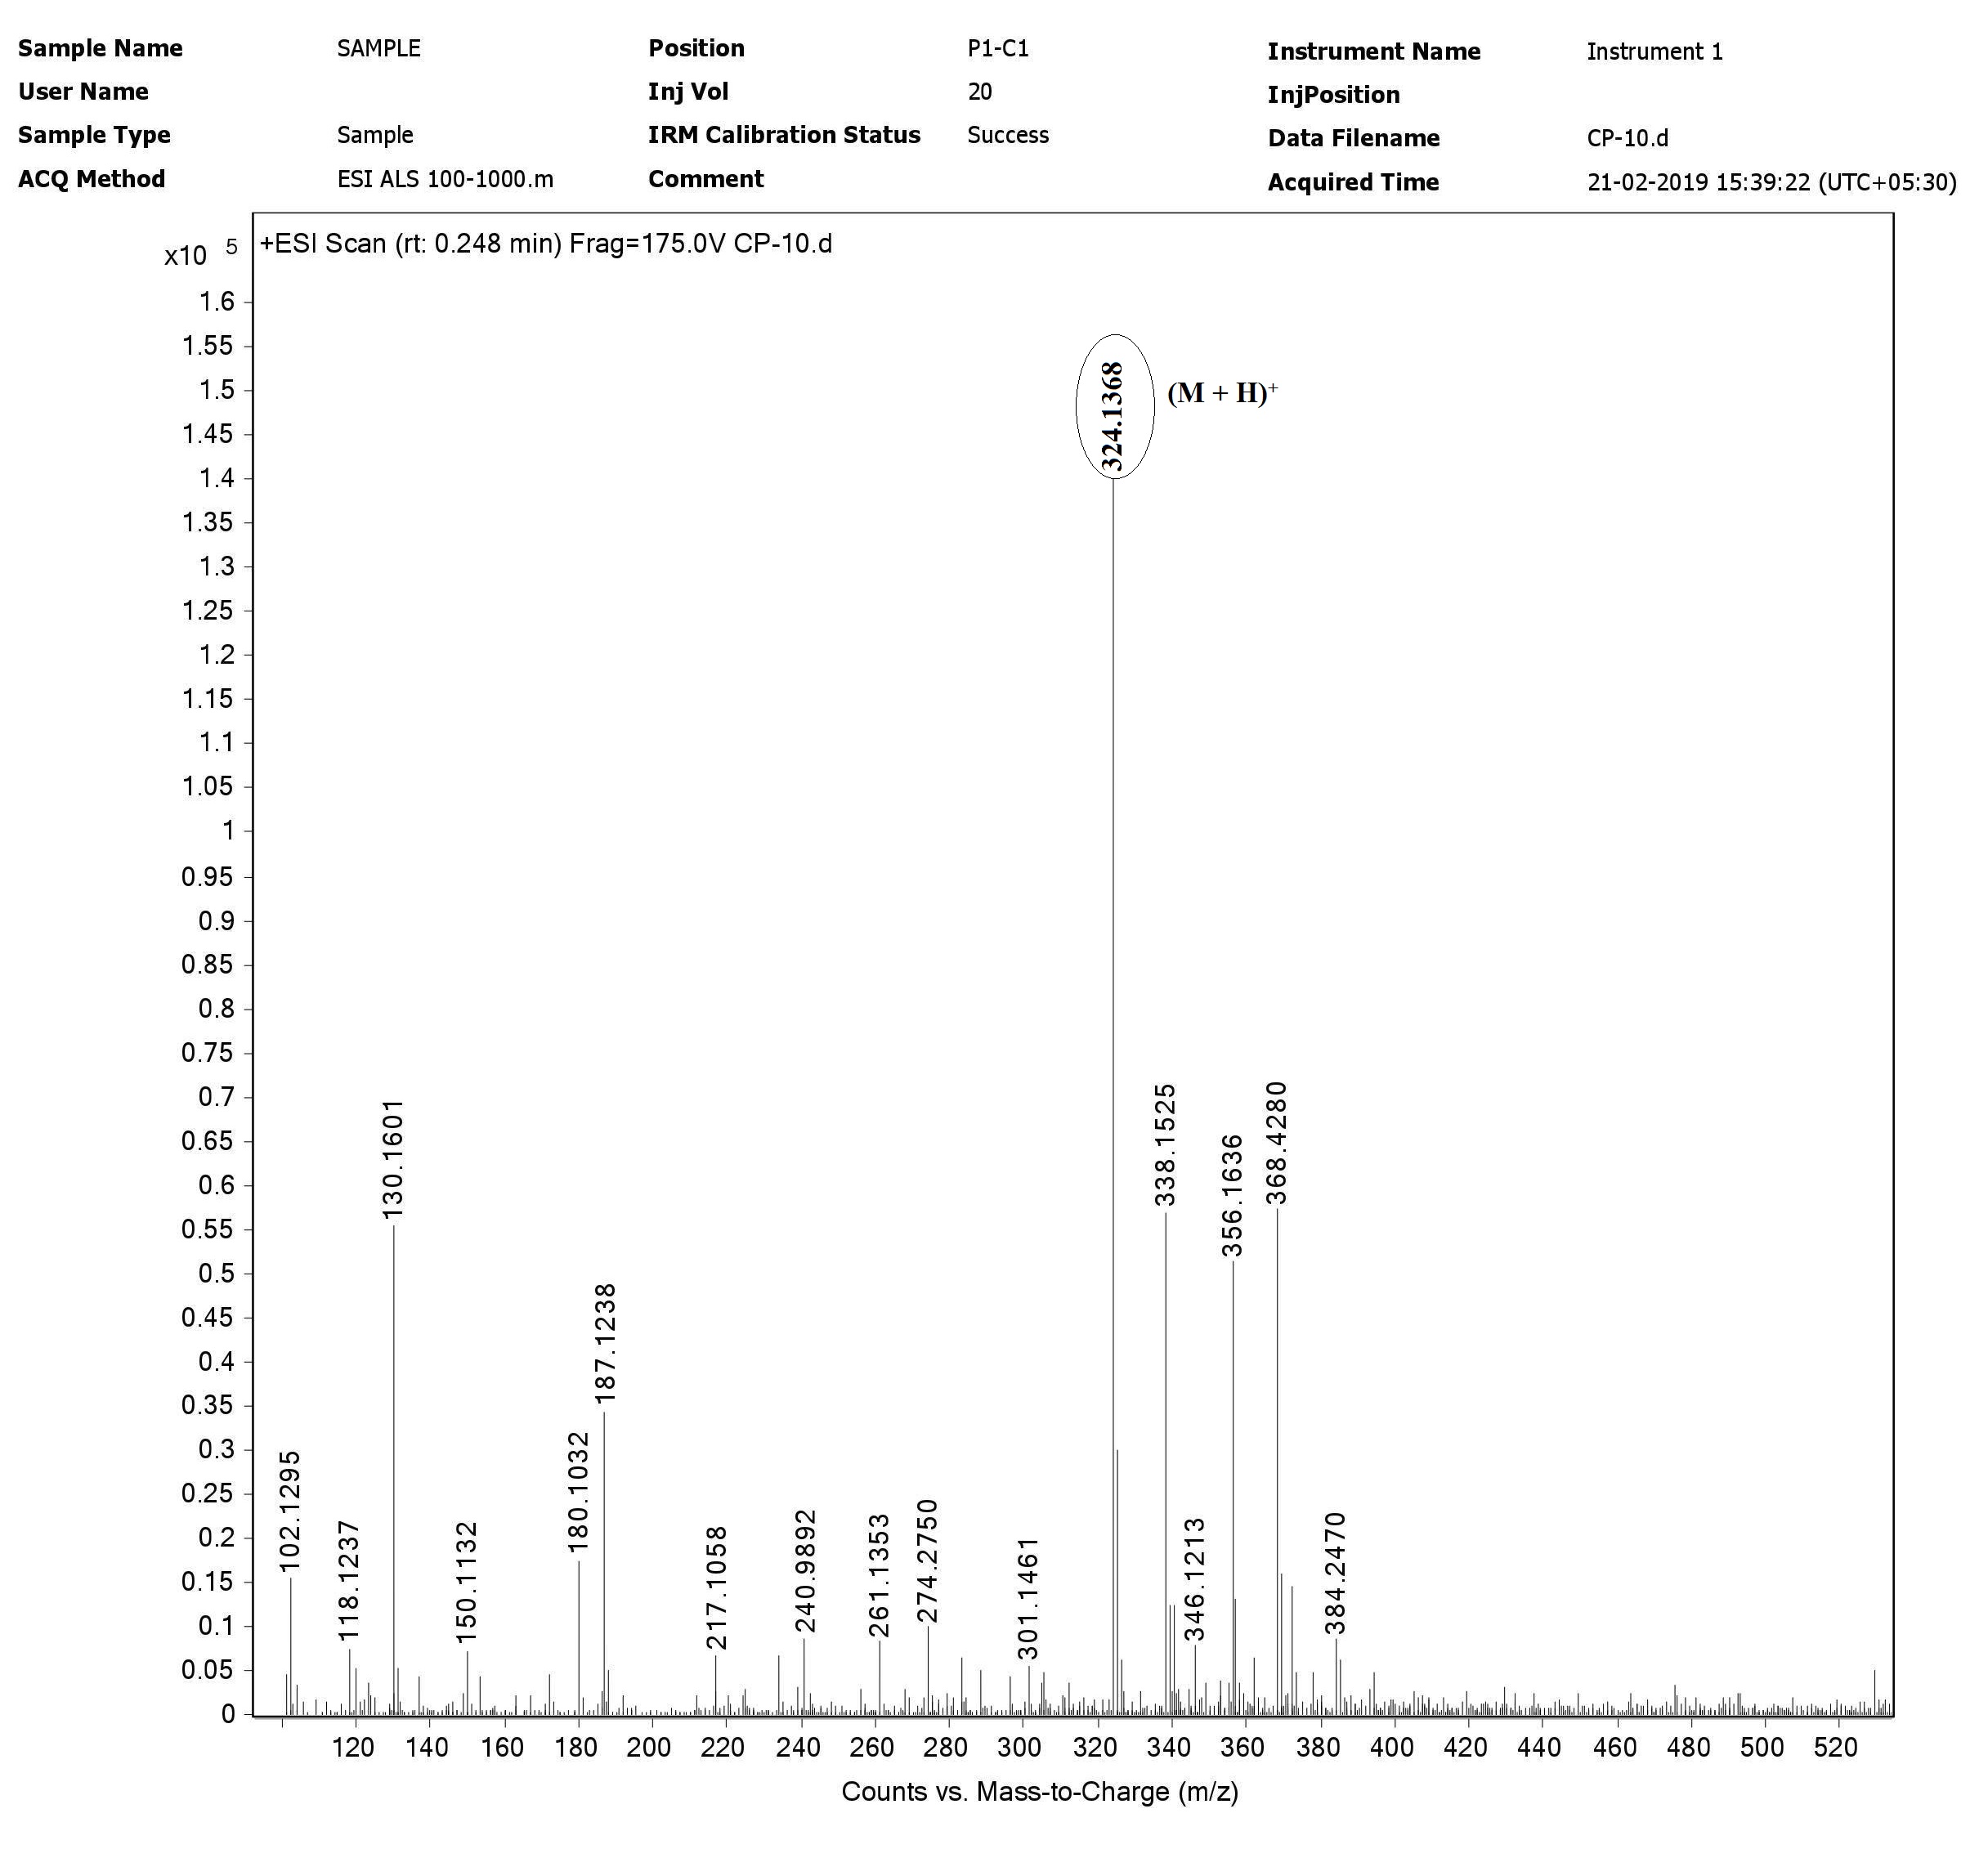


**Fig. S29.** HRMS spectra of **3**


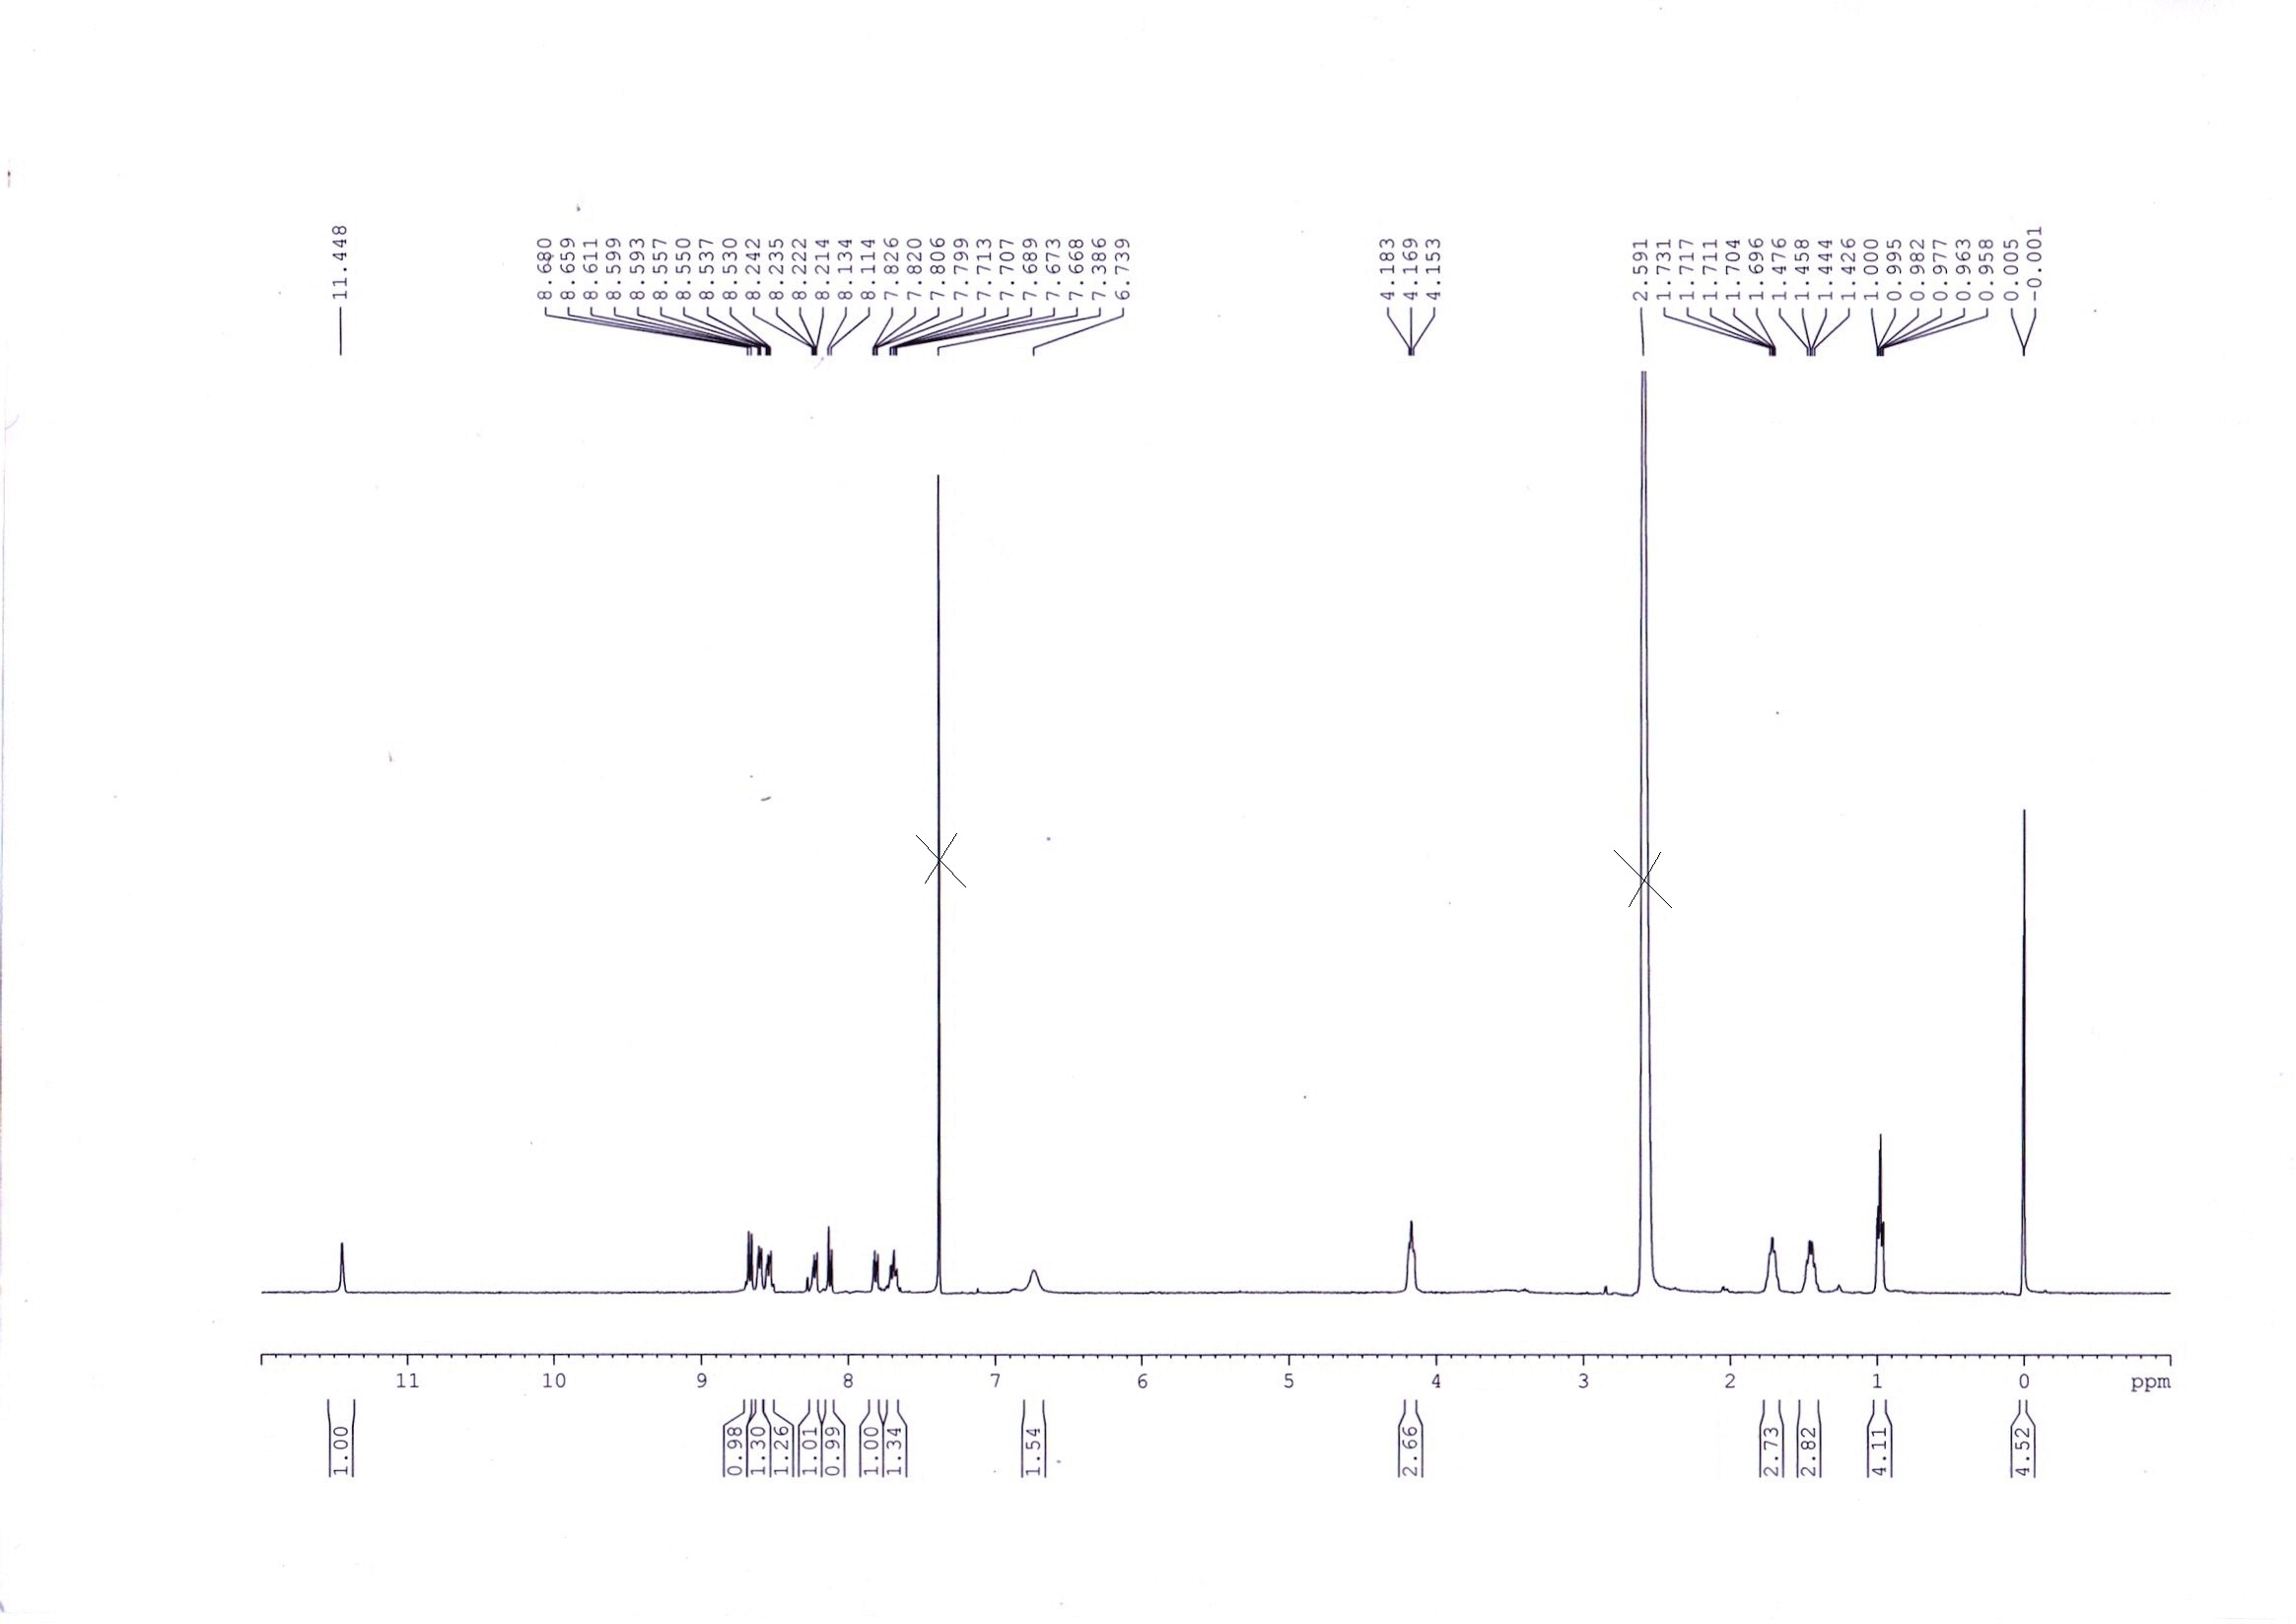


**Fig. S30**. 1H NMR spectra (400 MHz) of **1** in CDCl3 containing two drops of *d6*-DMSO.


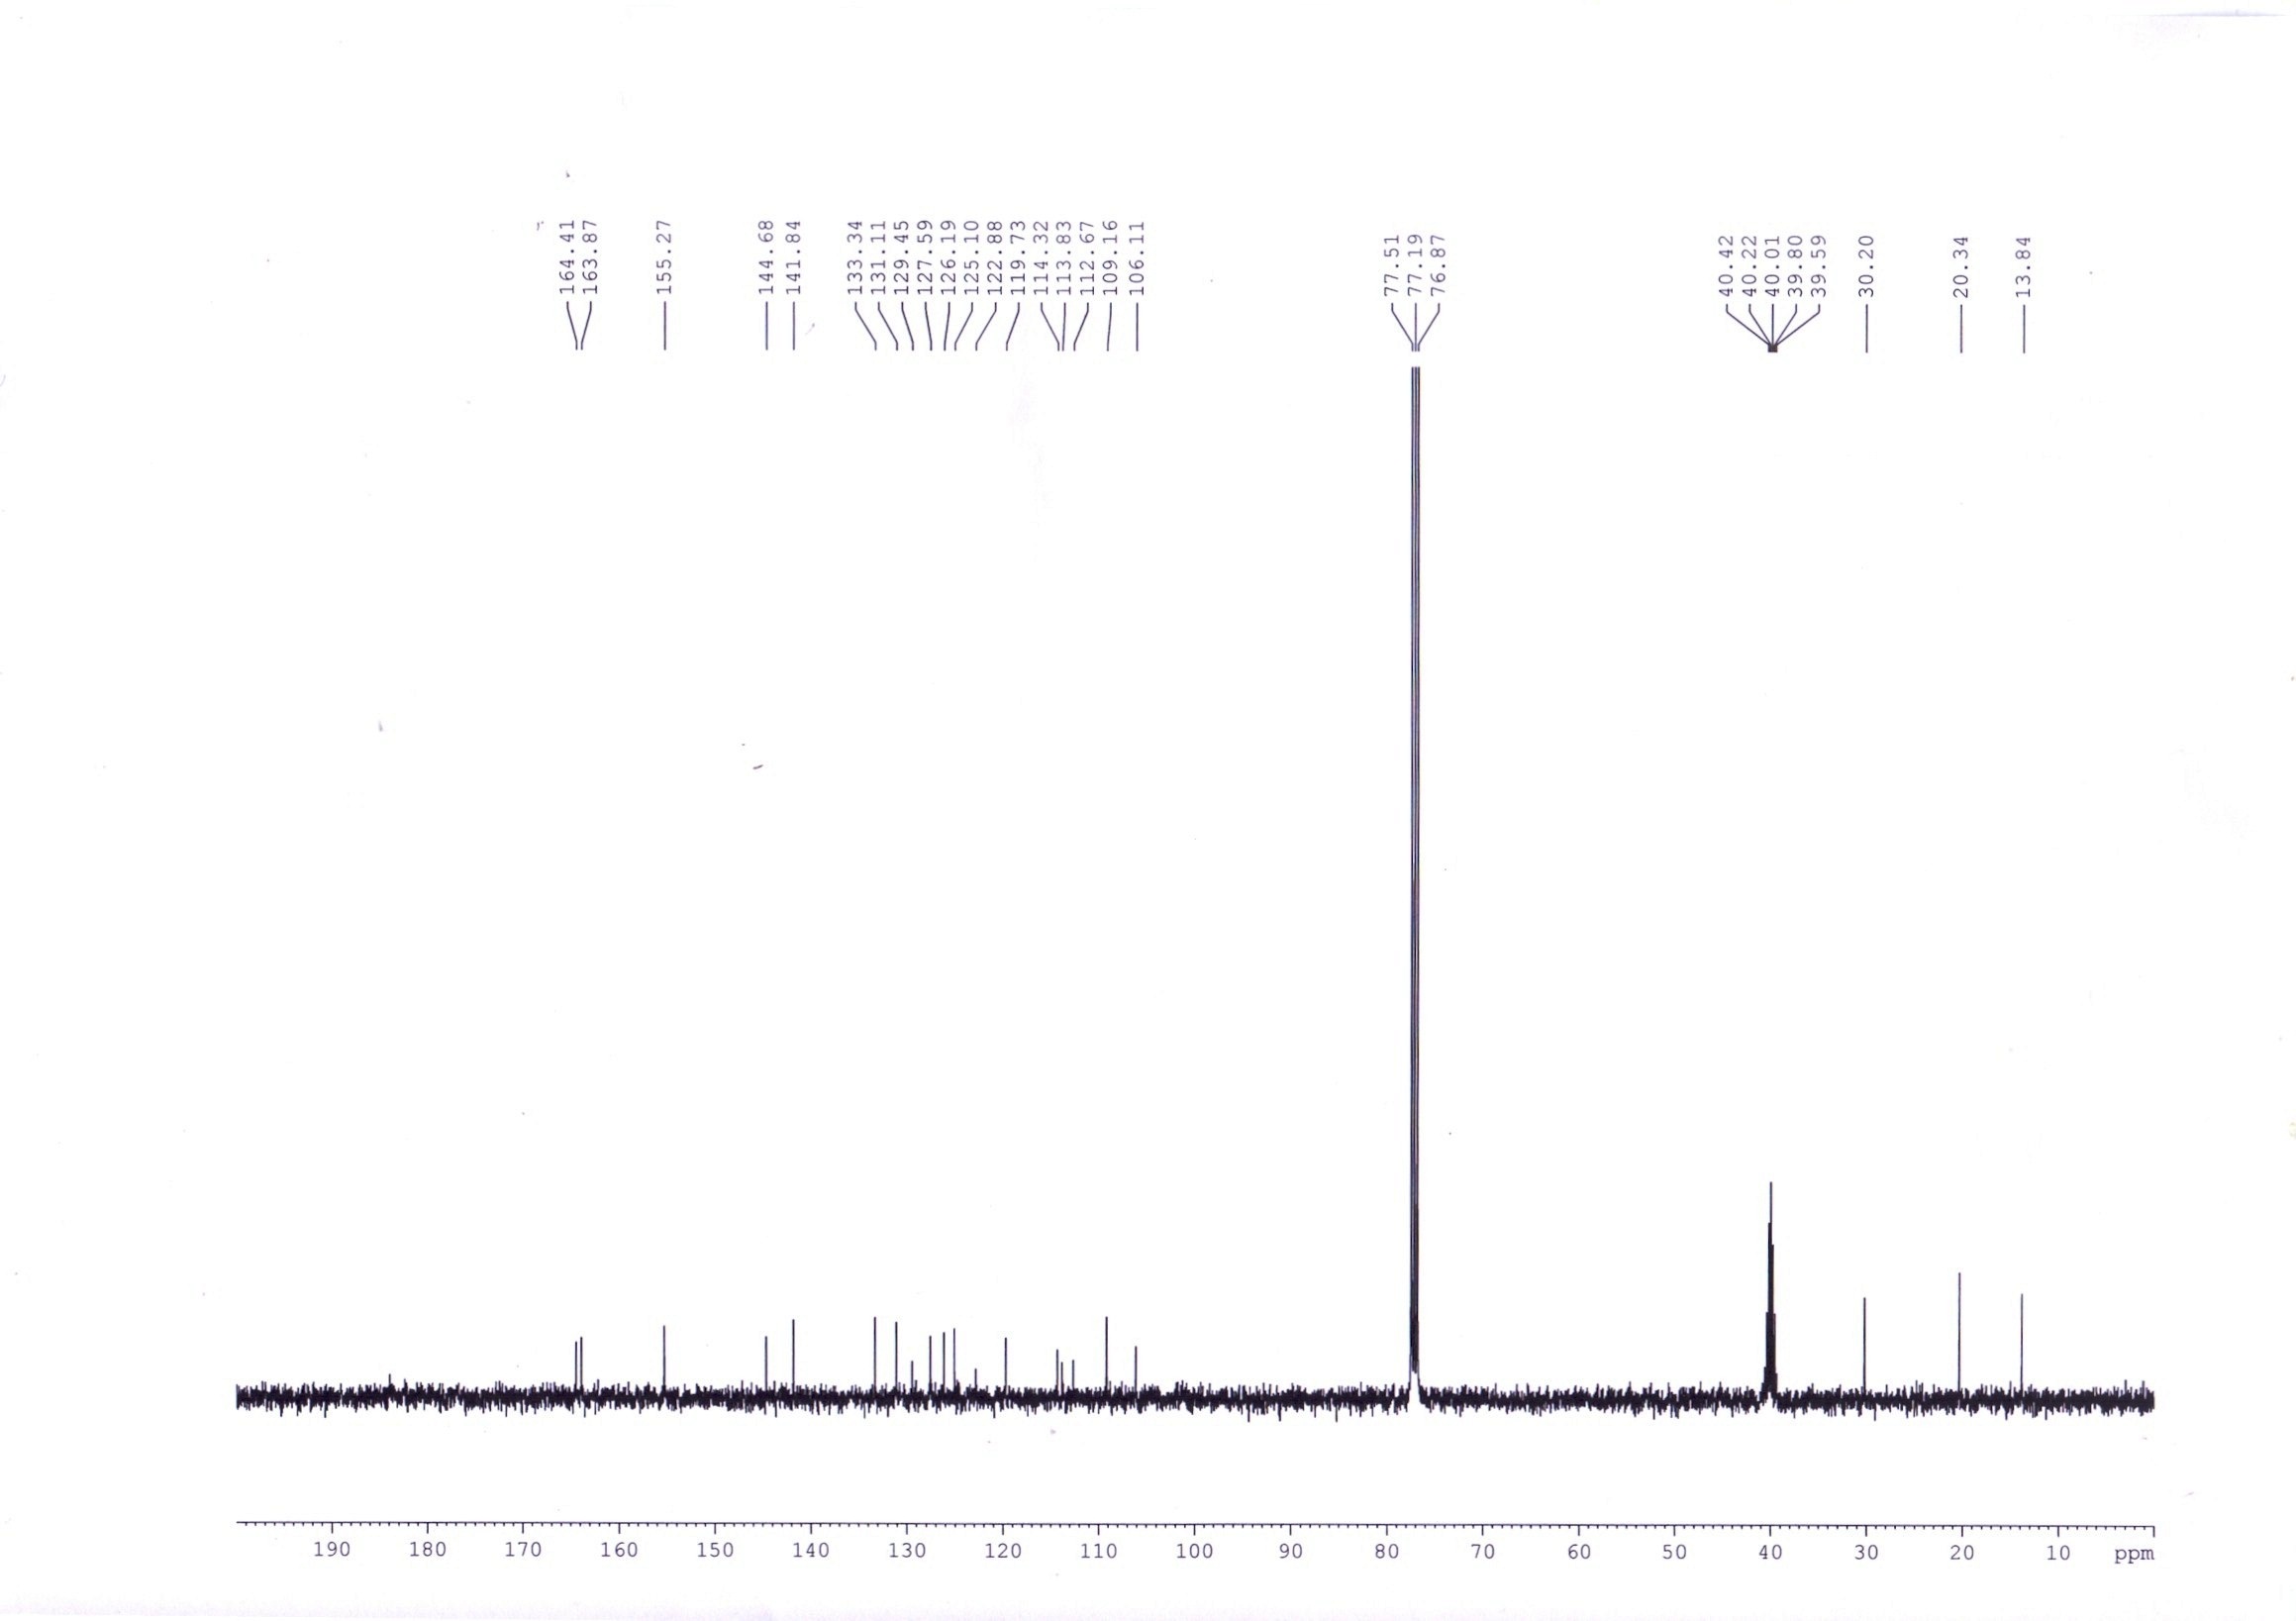


**Fig. S31**. 13C NMR spectra (100 MHz) of **1** in CDCl3 containing two drops of *d6*-DMSO.


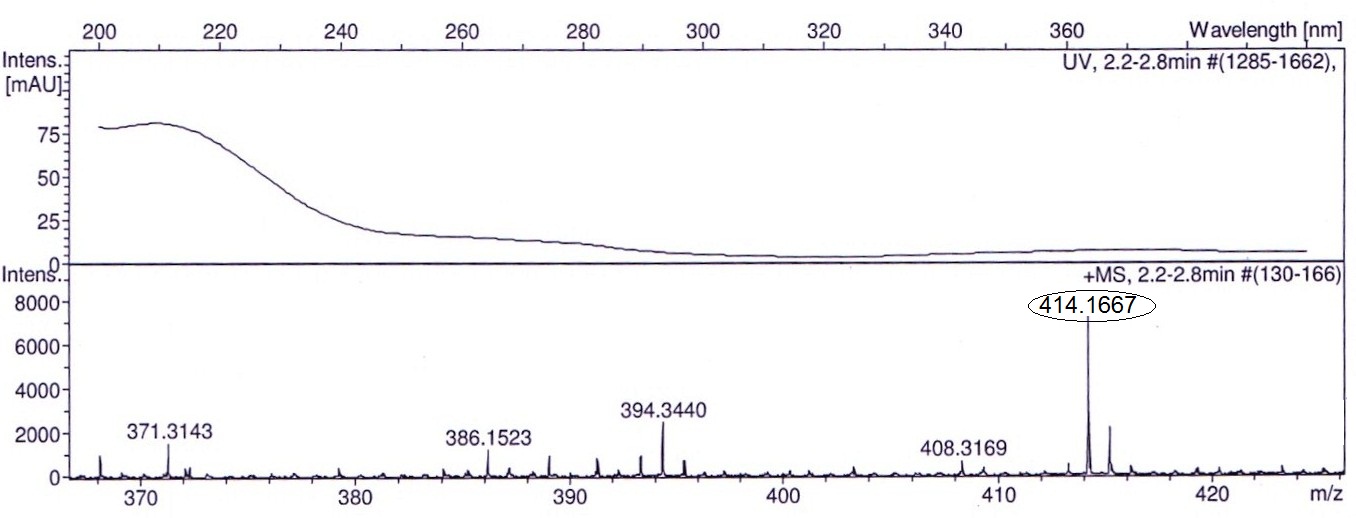


**Fig. S32.** HRMS spectra of **1**
